# Supplementary material for: Dairy Product Intake and Risk of Type 2 Diabetes in EPIC-InterAct: A Mendelian Randomization Study
Source: Oxford University Press journal article supplement (doi:10.2337/dc18-2034), 2019-02-06

# SUPPLEMENTARY DATA

**Supplementary Table 1. Traits associated with LP SNP rs4988235 or proxies ( $R^2>0.8$ ) according to GWAS studies included in phenoscanner and GWAS catalog.**

| Trait             | SNP       | Proxy SNP | $r^2$ | Consortium | N       | Effect allele | Other allele | EAF  | Beta   | SE     | P value             | Unit    |
|-------------------|-----------|-----------|-------|------------|---------|---------------|--------------|------|--------|--------|---------------------|---------|
| Hip circumference | rs4988235 |           |       | GIANT      | 207,713 | T             | C            | 0.76 | 0.022  | 0.0039 | $2 \times 10^{-8}$  | IVNT    |
| LDL cholesterol   | rs4988235 |           |       | GLGC       | 169,531 | T             | C            | 0.52 | -0.028 | 0.0042 | $3 \times 10^{-11}$ | IVNT    |
| Total cholesterol | rs4988235 |           |       | GLGC       | 183,761 | T             | C            | 0.52 | -0.031 | 0.004  | $4 \times 10^{-14}$ | IVNT    |
| Height            |           | rs6754311 | 0.965 | GIANT      | 250,456 | A             | G            | 0.76 | 0.018  | 0.0034 | $5 \times 10^{-8}$  | Z-score |

SNP = single nucleotide polymorphism, EAF = effect allele frequency, SE = standard error, GIANT = Genetic Investigation of Anthropometric Traits, GLGC = Global Lipids Genetics Consortium, IVNT = inverse normally rank transformed phenotype

# SUPPLEMENTARY DATA

**Supplementary Table 2. Dietary intake\* of participants from France and Italy in the EPIC-InterAct study subcohort.**

|                         | France, n= 332   |           | Italy, n=1467    |           |
|-------------------------|------------------|-----------|------------------|-----------|
|                         | Dietary intake   | No intake | Dietary intake   | No intake |
| Energy (kcal/day)       | 2152 (1789-2569) |           | 2241 (1801-2729) |           |
| Milk (g/day)            | 15 (0-150)       | 47.6      | 120 (0-189)      | 26.7      |
| Non-milk dairy (g/day)  | 209 (144-269)    | 0         | 82 (47-138)      | 0         |
| Milk beverages (g/day)  | 0 (0-0)          | 88.6      |                  |           |
| Milk for coffee (g/day) |                  |           |                  |           |
| Dairy creams (g/day)    | 1 (1-5)          | 10.2      | 0 (0-1)          | 39.9      |
| Cream desserts (g/day)  | 10 (0-29)        | 32.2      |                  |           |
| Curd (g/day)            | 19 (0-64)        | 33.4      |                  |           |
| Yoghurt (g/day)         | 81 (32-113)      | 11.7      | 8 (0-54)         | 40.5      |
| Ice cream (g/day)       | 2 (0-7)          | 32.2      | 11 (4-21)        | 8.5       |
| Cheese (g/day)          | 53 (30-86)       | 0.9       | 58 (35-85)       | 0         |
| Potatoes (g/day)        | 53 (32-81)       | 4.2       | 22 (12-38)       | 0.4       |
| Pasta/rice (g/day)      | 68 (42-106)      | 2.7       | 138 (83-210)     | 0.1       |
| Bread (g/day)           | 111 (73-166)     | 0.9       | 131 (95-203)     | 0.1       |
| Cereal (g/day)          | 202 (148-279)    | 0.3       | 305 (216-418)    | 0         |
| Vegetables (g/day)      | 269 (193-375)    | 0         | 155 (105-216)    | 0         |
| Legumes (g/day)         | 13 (3-29)        | 19.6      | 5 (2-12)         | 12.1      |
| Fruits (g/day)          | 245 (158-340)    | 1.8       | 293 (199-411)    | 0.1       |
| Nuts (g/day)            | 3 (0-7)          | 29.5      | 0 (0-1)          | 11        |
| Red meat (g/day)        | 45 (22-73)       | 6.6       | 45 (25-66)       | 0.7       |
| Poultry (g/day)         | 17 (3-30)        | 22.3      | 22 (12-34)       | 1.5       |
| Processed meat (g/day)  | 25 (15-39)       | 1.5       | 19 (11-32)       | 0.4       |
| Vegetable oils (g/day)  | 6 (3-8)          | 1.8       | 29 (21-38)       | 0         |
| Margarine (g/day)       | 0 (0-4)          | 53.9      | 0 (0-0)          | 16.5      |
| Butter (g/day)          | 4 (0-11)         | 16.3      | 1 (0-2)          | 9.5       |
| Sugar (g/day)           | 35 (17-59)       | 5.7       | 34 (20-54)       | 0.8       |
| Cake/cookies (g/day)    | 28 (14-56)       | 3.3       | 35 (15-66)       | 5.0       |
| Beverages (g/day) †     | 1356 (958-1829)  | 0         | 172 (110-272)    | 1.0       |
| Softdrinks (g/day)      | 0 (0-0)          | 80.7      | 0 (0-29)         | 54.3      |
| Juice (g/day)           | 23 (0-107)       | 33.1      | 8 (0-36)         | 42.3      |
| Coffee (g/day)          | 250 (75-413)     | 14.5      | 90 (60-130)      | 6.5       |
| Tea (g/day)             | 41 (0-301)       | 40.1      | 5 (0-43)         | 42.1      |
| Alcohol (g/day)         | 7 (2-17)         | 3.3       | 7 (0-24)         | 6.5       |
| Wine (g/day)            | 38 (4-119)       | 23.5      | 54 (2-250)       | 24.3      |

\*Dietary intake is expressed as median (p25-p75), no intake is expressed as percentage of non-consumers with available data. † Sum of all non-alcoholic beverages, excluding water and milk.

# SUPPLEMENTARY DATA

**Supplementary Table 3. Dietary intake\* of participants from Spain and the United Kingdom in the EPIC-InterAct study subcohort.**

|                         | Spain, n=2544    |           | United Kingdom n=1079 |           |
|-------------------------|------------------|-----------|-----------------------|-----------|
|                         | Dietary intake   | No intake | Dietary intake        | No intake |
| Energy (kcal/day)       | 2057 (1670-2556) |           | 1945 (1597-2387)      |           |
| Milk (g/day)            | 200 (107-307)    | 7.9       | 295 (149-440)         | 2.4       |
| Non-milk dairy (g/day)  | 50 (15-106)      | 10.4      | 67 (34-113)           | 0.6       |
| Milk beverages (g/day)  | 0 (0-0)          | 99.7      |                       |           |
| Milk for coffee (g/day) |                  |           |                       |           |
| Dairy creams (g/day)    | 0 (0-0)          | 97.2      | 1 (0-3)               | 33.7      |
| Cream desserts (g/day)  | 0 (0-0)          | 78.2      | 11 (1-22)             | 24.9      |
| Curd (g/day)            | 0 (0-0)          | 95        | 1 (0-4)               | 48.6      |
| Yoghurt (g/day)         | 0 (0-49)         | 58.6      | 18 (0-55)             | 29.6      |
| Ice cream (g/day)       | 0 (0-0)          | 83.5      | 6 (1-11)              | 22.3      |
| Cheese (g/day)          | 16 (1-43)        | 20.9      | 15 (5-19)             | 3.5       |
| Potatoes (g/day)        | 71 (44-106)      | 1.5       | 107 (70-133)          | 0.4       |
| Pasta/rice (g/day)      | 57 (38-81)       | 4.2       | 32 (14-60)            | 13.1      |
| Bread (g/day)           | 130 (84-191)     | 1.0       | 79 (39-112)           | 0         |
| Cereal (g/day)          | 195 (139-265)    | 0.2       | 167 (114-241)         | 0         |
| Vegetables (g/day)      | 234 (147-340)    | 0.1       | 237 (172-319)         | 0         |
| Legumes (g/day)         | 45 (25-69)       | 3.8       | 11 (6-21)             | 12.3      |
| Fruits (g/day)          | 274 (161-438)    | 5.2       | 198 (118-305)         | 0.6       |
| Nuts (g/day)            | 0 (0-4)          | 57.3      | 2 (0-4)               | 40.6      |
| Red meat (g/day)        | 34 (16-58)       | 4.1       | 32 (16-58)            | 4.3       |
| Poultry (g/day)         | 30 (17-49)       | 4.0       | 16 (8-49)             | 13.1      |
| Processed meat (g/day)  | 30 (14-53)       | 3.2       | 18 (9-31)             | 3.2       |
| Vegetable oils (g/day)  | 26 (18-36)       | 0         | 3 (2-5)               | 3.6       |
| Margarine (g/day)       | 0 (0-1)          | 73.2      | 10 (4-25)             | 10.7      |
| Butter (g/day)          | 0 (0-0)          | 93.3      | 0 (0-4)               | 28.0      |
| Sugar (g/day)           | 19 (8-32)        | 11.6      | 41 (20-69)            | 0.7       |
| Cake/cookies (g/day)    | 21 (0-55)        | 30.2      | 46 (24-86)            | 2.1       |
| Beverages (g/day) †     | 169 (74-289)     | 1.9       | 1168 (951-1414)       | 0.1       |
| Softdrinks (g/day)      | 0 (0-0)          | 79.1      | 32 (0-158)            | 25.9      |
| Juice (g/day)           | 1 (0-7)          | 38.6      | 17 (1-95)             | 23.0      |
| Coffee (g/day)          | 91 (12-175)      | 11.1      | 475 (95-488)          | 10.0      |
| Tea (g/day)             | 0 (0-0)          | 96.3      | 475 (475-855)         | 5.8       |
| Alcohol (g/day)         | 3 (0-19)         | 16.8      | 5 (1-11)              | 1.1       |
| Wine (g/day)            | 2 (0-150)        | 47.8      | 18 (1-54)             | 23.1      |

\*Dietary intake is expressed as median (p25-p75), no intake is expressed as percentage of non-consumers with available data. † Sum of all non-alcoholic beverages, excluding water and milk.

# SUPPLEMENTARY DATA

**Supplementary Table 4. Dietary intake\* of participants from the Netherlands and Germany in the EPIC-InterAct study subcohort.**

|                         | Netherlands, n=1176 |           | Germany, n=1783  |           |
|-------------------------|---------------------|-----------|------------------|-----------|
|                         | Dietary intake      | No intake | Dietary intake   | No intake |
| Energy (kcal/day)       | 1903 (1581-2275)    | 0         | 1949 (1590-2430) | 0         |
| Milk (g/day)            | 203 (81-382)        | 4.7       | 33 (2-100)       | 1.1       |
| Non-milk dairy (g/day)  | 169 (106-229)       | 0         | 137 (82-222)     | 0         |
| Milk beverages (g/day)  | 15 (1-31)           | 22.8      | 1 (0-16)         | 40.0      |
| Milk for coffee (g/day) | 5 (0-18)            | 39.1      | 0 (0-10)         | 64.8      |
| Dairy creams (g/day)    | 2 (1-4)             | 2.6       | 1 (1-3)          | 0.3       |
| Cream desserts (g/day)  | 18 (6-41)           | 4.8       | 6 (2-12)         | 7.6       |
| Curd (g/day)            | 6 (2-13)            | 4.8       | 13 (6-29)        | 2         |
| Yoghurt (g/day)         | 49 (15-90)          | 3.1       | 53 (13-108)      | 7.6       |
| Ice cream (g/day)       | 7 (2-12)            | 4.8       | 3 (1-6)          | 4.4       |
| Cheese (g/day)          | 31 (20-47)          | 0.9       | 32 (17-40)       | 0.4       |
| Potatoes (g/day)        | 82 (51-130)         | 0.2       | 83 (57-116)      | 0         |
| Pasta/rice (g/day)      | 32 (14-54)          | 2.3       | 20 (11-35)       | 0.8       |
| Bread (g/day)           | 120 (91-160)        | 0.1       | 150 (100-199)    | 0.1       |
| Cereal (g/day)          | 166 (128-220)       | 0         | 187 (139-239)    | 0         |
| Vegetables (g/day)      | 125 (99-160)        | 0         | 116 (88-154)     | 0         |
| Legumes (g/day)         | 7 (2-13)            | 9.1       | 2 (1-5)          | 5.7       |
| Fruits (g/day)          | 189 (118-273)       | 0.2       | 106 (81-182)     | 0.1       |
| Nuts (g/day)            | 5 (1-10)            | 4.8       | 1 (0-4)          | 9.9       |
| Red meat (g/day)        | 55 (33-80)          | 0.4       | 25 (15-39)       | 0.1       |
| Poultry (g/day)         | 8 (4-15)            | 5.2       | 9 (5-17)         | 0.4       |
| Processed meat (g/day)  | 21 (10-36)          | 0.9       | 54 (31-81)       | 0.1       |
| Vegetable oils (g/day)  | 3 (1-5)             | 6.0       | 5 (3-7)          | 0         |
| Margarine (g/day)       | 13 (6-21)           | 1.1       | 6 (1-20)         | 0.1       |
| Butter (g/day)          | 3 (1-5)             | 0         | 5 (1-12)         | 1.2       |
| Sugar (g/day)           | 36 (21-56)          | 0.2       | 27 (15-47)       | 0.5       |
| Cake/cookies (g/day)    | 27 (14-45)          | 1.1       | 47 (23-78)       | 0.7       |
| Beverages (g/day) †     | 1403 (1120-1715)    | 0         | 1314 (983-1754)  | 0.1       |
| Softdrinks (g/day)      | 58 (11-138)         | 17.1      | 2 (0-29)         | 45.2      |
| Juice (g/day)           | 54 (10-134)         | 16.3      | 115 (37-238)     | 1.9       |
| Coffee (g/day)          | 500 (375-750)       | 4         | 392 (261-580)    | 4.3       |
| Tea (g/day)             | 238 (68-430)        | 8.4       | 24 (2-150)       | 22.5      |
| Alcohol (g/day)         | 5 (1-16)            | 0.3       | 9 (3-22)         | 0         |
| Wine (g/day)            | 13 (0-57)           | 28.2      | 37 (7-94)        | 7         |

\*Dietary intake is expressed as median (p25-p75), no intake is expressed as percentage of non-consumers with available data. † Sum of all non-alcoholic beverages, excluding water and milk.

# SUPPLEMENTARY DATA

**Supplementary Table 5. Dietary intake of participants from Sweden and Denmark in the EPIC-InterAct study subcohort.**

|                         | Sweden, n=2451   |           | Denmark, n=1890  |           |
|-------------------------|------------------|-----------|------------------|-----------|
|                         | Dietary intake   | No intake | Dietary intake   | No intake |
| Energy (kcal/day)       | 2035 (1652-2491) | 0         | 2175 (1812-2595) | 0         |
| Milk (g/day)            | 197 (80-403)     | 2.4       | 182 (30-509)     | 0         |
| Non-milk dairy (g/day)  | 124 (61-228)     | 0.2       | 97 (50-210)      | 0.2       |
| Milk beverages (g/day)  |                  |           | 3 (3-7)          | 19.1      |
| Milk for coffee (g/day) |                  |           |                  |           |
| Dairy creams (g/day)    | 4 (1-9)          | 14.5      | 2 (1-4)          | 2.2       |
| Cream desserts (g/day)  | 0 (0-0)          | 81.6      | 3 (0-7)          | 35.5      |
| Curd (g/day)            | 0 (0-0)          | 86.2      | 0 (0-1)          | 50.2      |
| Yoghurt (g/day)         | 71 (3-175)       | 23.8      | 28 (5-156)       | 5.2       |
| Ice cream (g/day)       | 4 (1-11)         | 10.0      | 1 (1-3)          | 3.2       |
| Cheese (g/day)          | 29 (17-48)       | 1.3       | 25 (18-53)       | 1.3       |
| Potatoes (g/day)        | 126 (78-180)     | 0.5       | 134 (89-194)     | 0         |
| Pasta/rice (g/day)      | 30 (9-54)        | 21.3      | 36 (21-61)       | 1.1       |
| Bread (g/day)           | 98 (69-142)      | 0         | 140 (103-187)    | 0         |
| Cereal (g/day)          | 182 (127-261)    | 0         | 207 (157-265)    | 0         |
| Vegetables (g/day)      | 109 (60-178)     | 0         | 163 (104-232)    | 0         |
| Legumes (g/day)         | 0 (0-1)          | 58.6      | 0 (0-2)          | 26.9      |
| Fruits (g/day)          | 147 (87-241)     | 0.7       | 143 (71-242)     | 0         |
| Nuts (g/day)            | 0 (0-1)          | 44.1      | 1 (1-2)          | 24.8      |
| Red meat (g/day)        | 23 (11-43)       | 4.1       | 73 (52-99)       | 0.1       |
| Poultry (g/day)         | 7 (0-16)         | 27.9      | 18 (11-27)       | 1.2       |
| Processed meat (g/day)  | 36 (22-55)       | 2.1       | 25 (14-41)       | 0.2       |
| Vegetable oils (g/day)  | 0 (0-2)          | 45.1      | 1 (0-5)          | 14.8      |
| Margarine (g/day)       | 31 (19-46)       | 0.4       | 17 (6-29)        | 0.2       |
| Butter (g/day)          | 0 (0-0)          | 65.0      | 0 (0-0)          | 79.3      |
| Sugar (g/day)           | 36 (19-61)       | 0.5       | 54 (31-95)       | 0.1       |
| Cake/cookies (g/day)    | 41 (22-65)       | 1.8       | 13 (6-26)        | 2.1       |
| Beverages (g/day) †     | 1032 (700-1488)  | 0         | 1850 (1454-2324) | 0         |
| Softdrinks (g/day)      | 39 (0-127)       | 31.5      | 16 (0-89)        | 28.6      |
| Juice (g/day)           | 13 (0-79)        | 30.4      | 8 (2-43)         | 4.9       |
| Coffee (g/day)          | 400 (300-601)    | 3.8       | 900 (500-1300)   | 3.7       |
| Tea (g/day)             | 0 (0-16)         | 65.7      | 86 (3-500)       | 17.2      |
| Alcohol (g/day)         | 4 (1-11)         | 13.1      | 14 (6-32)        | 1.9       |
| Wine (g/day)            | 1 (0-34)         | 38.3      | 54 (10-98)       | 4.0       |

\*Dietary intake is expressed as median (p25-p75), no intake is expressed as percentage of non-consumers with available data. † Sum of all non-alcoholic beverages, excluding water and milk.

# SUPPLEMENTARY DATA

**Supplementary Table 6. Observed allele frequencies and Hardy Weinberg equilibrium for rs4988235 in the EPIC-InterAct study subcohort.**

|             | n      | CC    | CT    | TT    | p value*           |
|-------------|--------|-------|-------|-------|--------------------|
| France      | 332    | 71    | 174   | 87    | 0.40               |
| Italy       | 1,467  | 636   | 723   | 108   | $5 \times 10^{-7}$ |
| Spain       | 2,544  | 562   | 1,405 | 577   | $2 \times 10^{-7}$ |
| UK          | 1,079  | 85    | 502   | 492   | 0.006              |
| Netherlands | 1,176  | 110   | 543   | 523   | 0.08               |
| Germany     | 1,783  | 253   | 944   | 586   | $5 \times 10^{-5}$ |
| Sweden      | 2,451  | 155   | 974   | 1,322 | 0.18               |
| Denmark     | 1,890  | 92    | 847   | 951   | $2 \times 10^{-8}$ |
| Total       | 12,722 | 1,964 | 6,122 | 4,646 | 0.54               |

C = lactase non-persistence allele. T = lactase persistence allele. SNP dosage for rs4899235 were rounded to 0,1 or 2 to examine HWE for the total subcohort, and stratified to country. \* P value is derived from chi squared test comparing observed versus expected LP genotypes based on the HWE equation.

# SUPPLEMENTARY DATA

**Supplementary Table 7. Baseline characteristics of the EPIC-InterAct study subcohort by rs4988235 genotype.**

| <i>Baseline characteristics</i>  | <i>C/C*</i>   | <i>C/T*</i>   | <i>T/T*</i>   |
|----------------------------------|---------------|---------------|---------------|
| n (persons)                      | 1,964         | 6,112         | 4,646         |
| age                              | 51 ± 9        | 52 ± 9        | 53 ± 9        |
| male sex                         | 37.6%         | 38.4%         | 38.6%         |
| current smoker                   | 24.9%         | 26.1%         | 26.8%         |
| former smoker                    | 25.2%         | 27.1%         | 27.7%         |
| hypertension                     | 19.1%         | 18.9%         | 17.4%         |
| systolic blood pressure (mmHg)   | 129 ± 18      | 133 ± 20      | 134 ± 20      |
| diastolic blood pressure (mmHg)  | 81 ± 10       | 82 ± 11       | 82 ± 11       |
| total cholesterol (mmol/L)       | 5.9 ± 1.1     | 5.9 ± 1.1     | 6.0 ± 1.1     |
| HDL cholesterol (mmol/L)         | 1.5 ± 0.4     | 1.5 ± 0.4     | 1.5 ± 0.4     |
| LDL cholesterol (mmol/L)         | 3.8 ± 1.0     | 3.8 ± 1.0     | 3.8 ± 1.0     |
| triglycerides (mmol/L)           | 1.0 (0.7-1.5) | 1.1 (0.8-1.6) | 1.2 (0.8-1.7) |
| lipoprotein a (mg/L)             | 385 (201-658) | 394 (200-702) | 367 (202-668) |
| physically inactive              | 26.4%         | 23.1%         | 20.3%         |
| BMI (kg/m <sup>2</sup> )         | 26.4 ± 4.3    | 26.0 ± 4.1    | 25.8 ± 4.2    |
| waist-hip ratio                  | 0.85 ± 0.09   | 0.85 ± 0.09   | 0.85 ± 0.09   |
| HbA1c > 6.5% (>48 mmol/mol)      | 1.5%          | 1.3%          | 1.5%          |
| low level of education †         | 46.7%         | 41.3%         | 37.0%         |
| premenopausal status ‡           | 38.5%         | 35.1%         | 26.1%         |
| history of myocardial infarction | 1.2%          | 1.3%          | 1.7%          |
| history of stroke                | 1.1%          | 0.6%          | 0.2%          |

C/C = lactase non-persistent, C/T = intermediate, T/T = lactase persistent. Most probable LP genotype based on rounded SNP dosage. \* Data are expressed as mean ± standard deviation, median (quartile 1 – quartile 4) or percentage of participants with available data for variable.† no education or only primary school education. ‡ Percentage among women.

# SUPPLEMENTARY DATA

**Supplementary Table 8. Dietary intakes of the EPIC-InterAct study subcohort by rs4988235 genotype.**

| <i>Dietary intakes</i>  | <i>C/C*</i>      | <i>C/T*</i>      | <i>T/T*</i>      |
|-------------------------|------------------|------------------|------------------|
| Energy (kcal/day)       | 2084 (1690–2580) | 2059 (1686-2521) | 2038 (1663-2482) |
| Milk (g/day)            | 146 (19-225)     | 160 (36-299)     | 188 (48-373)     |
| Non-milk dairy (g/day)  | 82 (40-151)      | 100 (47-183)     | 109 (55-195)     |
| Milk beverages (g/day)  | 0 (0-3)          | 0 (0-7)          | 3 (0-15)         |
| Milk for coffee (g/day) | 0 (0-14)         | 0 (0-13)         | 0 (0-14)         |
| Dairy creams (g/day)    | 0 (0-2)          | 1 (0-3)          | 2 (0-4)          |
| Cream desserts (g/day)  | 0 (0-11)         | 3 (0-16)         | 3 (0-16)         |
| Curd (g/day)            | 0 (0-7)          | 0 (0-8)          | 0 (0-6.4)        |
| Yoghurt (g/day)         | 15 (0-63)        | 27 (0-97)        | 36 (3-108)       |
| Ice cream (g/day)       | 3 (0-11)         | 3 (0-9)          | 3 (1-8)          |
| Cheese (g/day)          | 34 (16-61)       | 28 (14-51)       | 26 (14-45)       |
| Potatoes (g/day)        | 59 (26-102)      | 84 (46-132)      | 100 (63-150)     |
| Pasta/rice (g/day)      | 59 (29-111)      | 42 (21-77)       | 34 (17-60)       |
| Bread (g/day)           | 129 (90-192)     | 123 (82-178)     | 115 (78-166)     |
| Cereal (g/day)          | 220 (153-310)    | 198 (141-273)    | 186 (134-251)    |
| Vegetables (g/day)      | 160 (105-251)    | 158 (102-240)    | 145 (93-222)     |
| Legumes (g/day)         | 8 (1-31)         | 5 (1-23)         | 2 (0-11)         |
| Fruits (g/day)          | 241 (136-370)    | 188 (102-304)    | 163 (90-272)     |
| Nuts (g/day)            | 0 (0-3)          | 1 (0-3)          | 1 (0-3)          |
| Red meat (g/day)        | 37 (19-64)       | 38 (19-66)       | 39 (18-67)       |
| Poultry (g/day)         | 20 (9-35)        | 16 (7-31)        | 12 (5-25)        |
| Processed meat (g/day)  | 25 (13-48)       | 29 (15-51)       | 29 (16-49)       |
| Vegetable oils (g/day)  | 18 (5-29)        | 6 (1-20)         | 3 (0-7)          |
| Margarine (g/day)       | 0 (0-8)          | 5 (0-21)         | 14 (2-30)        |
| Butter (g/day)          | 0 (0-2)          | 0 (0-3)          | 0 (0-3)          |
| Sugar (g/day)           | 29 (15-50)       | 32 (16-54)       | 35 (18-60)       |
| Cake/cookies (g/day)    | 31 (12-63)       | 31 (12-60)       | 30 (12-57)       |
| Beverages (g/day) †     | 311 (138-1157)   | 957 (256-1520)   | 1179 (697-1686)  |
| Softdrinks (g/day)      | 0 (0-43)         | 3 (0-67)         | 16 (0-90)        |
| Juice (g/day)           | 8 (0-63)         | 14 (0-90)        | 17 (1-95)        |
| Coffee (g/day)          | 130 (58-300)     | 271 (90-541)     | 450 (172-675)    |
| Tea (g/day)             | 0 (0-86)         | 5 (0-190)        | 12 (0-250)       |
| Alcohol (g/day)         | 5.7 (1-21)       | 7 (1-19)         | 7 (1-17)         |
| Wine (g/day)            | 21 (0-125)       | 18 (0-98)        | 18 (1-75)        |

C/C = lactase non-persistent, C/T = intermediate, T/T = lactase persistent. Most probable LP genotype based on rounded SNP loading \*Data are expressed as median (quartile 1 – quartile 4).

† All non-alcoholic beverages, excluding water and milk.

# SUPPLEMENTARY DATA

**Supplementary Table 9. Association between genetic lactase persistence and diabetes (gene-outcome) and association between genetically predicted milk intake and diabetes in sensitivity analyses.**

|                                           | 95% confidence |          |      | N cases | N total |
|-------------------------------------------|----------------|----------|------|---------|---------|
|                                           | HR*            | interval |      |         |         |
| Percentile bootstrap (n samples = 10,000) | 0.99           | 0.94     | 1.04 | 9,686   | 21,820  |
| Excluding HbA1c> 6.5% (48 mmol/mol)       | 0.98           | 0.92     | 1.05 | 9,686   | 21,747  |
| Only Illumina 660W quad chip              | 0.97           | 0.90     | 1.05 | 4,543   | 8,955   |
| Only countries in HWE                     | 1.04           | 0.81     | 1.33 | 3,789   | 6,679   |
| LP dominant model                         | 0.99           | 0.92     | 1.07 | 9,686   | 21,820  |

\* HR for diabetes in gene-outcome is expressed per additional lactase persistence allele. HR for diabetes in IV analyses is expressed per 15 gram of genetically predicted milk intake. Analyses are performed per country, using age as underlying time scale and are adjusted for sex, genetic variability (first three principal components), study centre and genotyping platform. The reported overall estimates were obtained by pooling country-specific results in random-effects meta-analysis.

## SUPPLEMENTARY DATA

### Supplementary Figure S1. EPIC-InterAct case-cohort study before and after exclusions.

\*N for overlap between diabetes cases and subcohort

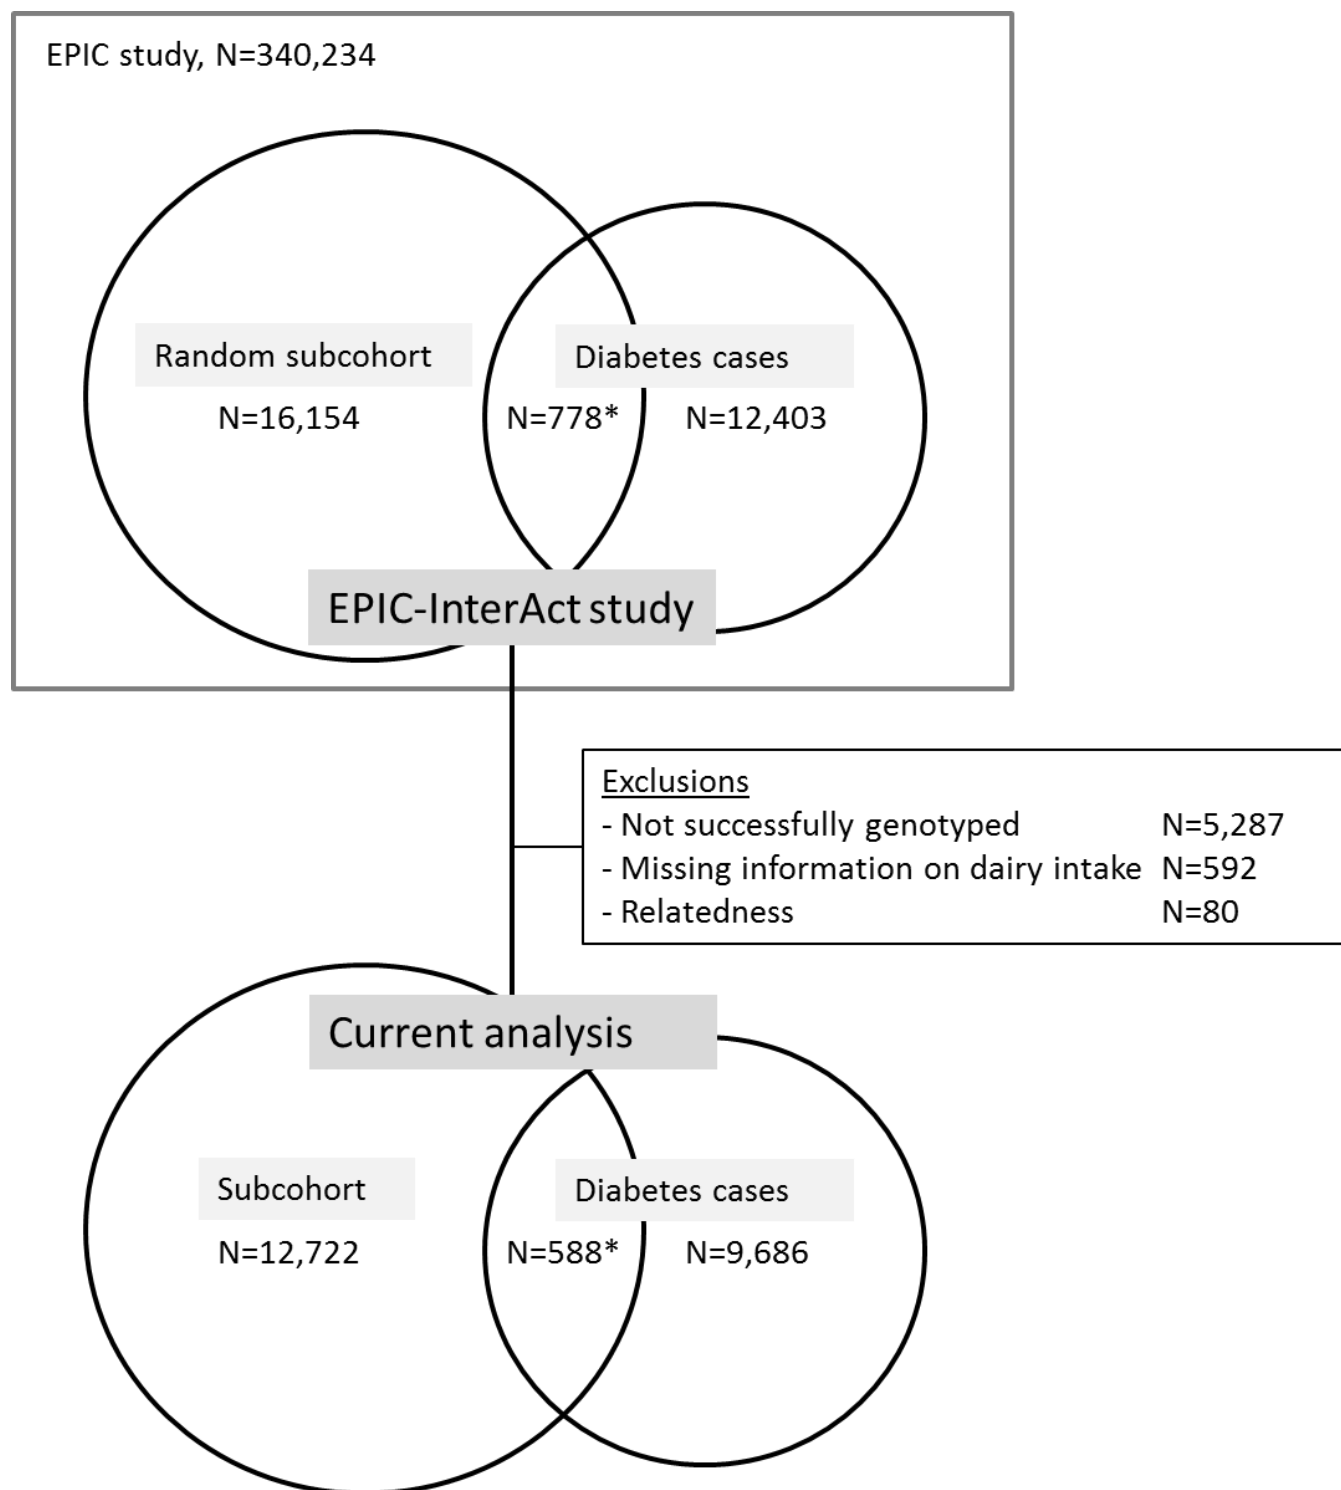

## SUPPLEMENTARY DATA

### Supplementary Figure S2. Association between genetically predicted milk intake (per 15g) and diabetes per country and pooled.\*

\* Hazard ratio for diabetes is expressed per 15 gram of genetically predicted milk intake. Analyses are performed per country, using age as underlying time scale and are adjusted for sex, genetic variability (first three principal components), study centre and genotyping platform. The reported overall estimates were obtained by pooling country-specific results in random-effects meta-analysis using restricted maximum-likelihood estimation, adjusting for study size with inverse variance weights.

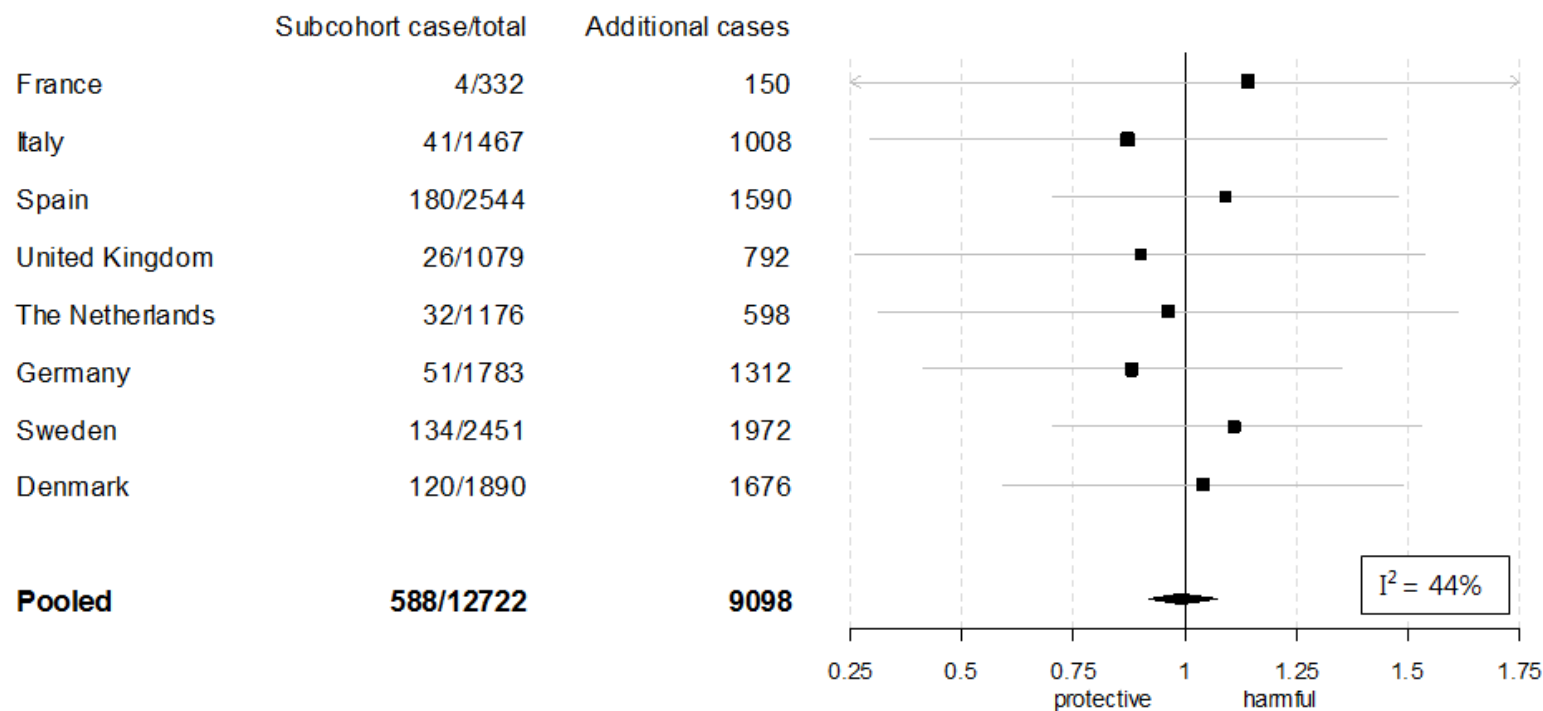

Supplement: dc182034supplementarydata.pdf [file dc182034supplementarydata.pdf]
